# Supplementary material for: Ten emerging SARS-CoV-2 spike variants exhibit variable infectivity, animal tropism, and antibody neutralization
Source: PubMed Central journal article supplement (PMC8514557; doi:10.1038/s42003-021-02728-4), 2021-10-13
Supplement: 42003_2021_2728_MOESM2_ESM.pdf [file 42003_2021_2728_MOESM2_ESM.pdf]

| <b>Mutation</b>  | <b>Oligonucleotides</b>                             |
|------------------|-----------------------------------------------------|
| L5F              | ATCCGCCACCATGTTTCGTGTTCTTCGTGCTGCTGCCTCTGGTGAGC     |
| S13I             | CTGCCTCTGGTGAGCATCCAGTGCGTGAATCTG                   |
| L18F             | TGCGTGAATTTTACCACCAGAACCCAGCT                       |
| L18F, T20N, P26S | TGCGTGAATTTTACCAACAGAACCCAGCTGCCTTCTGCCTACACC       |
| Q52R             | AGTAGTGTATTACATAGTACCCGGGACCTGTTTCTACCTTTCTTCAG     |
| HV69-70Del       | CGTGACCTGGTTCACGCCATCAGCGGCACCAATGGCACCAAGAGATTC    |
| A67V-HV69-70Del  | TTCAGTAACGTGACCTGGTTCACGTCATCAGCGGCACCAATGGCA       |
| D80A             | CAATGGCACCAAGAGATTTCGCCAATCCTGTGCTGCCTTTCAAT        |
| T95I             | CGGCGTGTACTTCGCCAGCATCGAGAAGAGCAATATCATCA           |
| D138Y            | TTCCAGTTCTGCAATTACCCTTTCTGGGTGTT                    |
| Y144/145Del      | AATGACCCTTTCTGGGTGTTTATCATAAGAACAACAAGAGC           |
| W152C            | CATAAGAACAACAAGAGCTGCATGGAGAGCGAGTTCCG              |
| R190S            | TTTCAAGAATCTGAGCGAGTTCGTGTTCA                       |
| D215G            | CACCCATTAATCTGGTGAGAGGCCTGCCTCAGGGCTTCAGC           |
| LAL242-244Del    | TATCACCAGATTCCAGACCCTGCACAGATCATATCTTACACC          |
| D253G            | GATCATATCTTACACCAGGCGGTTTCGTCAAGCGGTTGGACCGC        |
| K417T            | CAGGGCAGACCGGCACGATCGCCGACTACAAT                    |
| K417N            | CGCCAGGGCAGACCGGCAATATCGCCGACTACAATTAC              |
| L452R            | TTGGAGGCAATTACAATTACCGGTACAGACTGTTTCAGAAAGAG        |
| Y453F            | GTTGGAGGCAATTACAATTACCTGTTTCAGACTGTTTCAGAAAGAGCAATC |
| S477N            | GCACCGAGATCTACCAGGCCGGCaacACACCGTGTAATGGCGTGGAGGGC  |
| E484K            | CACCGTGTAATGGCGTGAAGGGCTTCAATTGCTACTTCC             |
| N501Y            | AGAGCTACGGCTTCCAGCCTACctacGGCGTGGGCTACCAGCCTTACAG   |
| A570D            | CAACAATTCGGCAGAGACATCGACGACACCACAGATGCTGTAAGAGAC    |
| D614G            | GTGGCCGTGCTGTACCAGGGCGTGAATTGCACCGAGGT              |
| H655Y            | CTGCCTGATCGGCGCCGAGTACGTGAATAATAGCTACG              |
| Q677H            | GCCAGCTACCAGACCCATACCAATAGCCCTAGA                   |
| P681H            | CTACCAGACCCAGACCAATAGCCACAGAAGAGCCAGAAGCGTGGCCAGCC  |
| A701V            | CTACACCATGAGCCTGGGCGTGGAGAATAGCGTGGCCTAC            |
| I692V            | CAGAAGCGTGGCCAGCCAGAGCGTGATCGCCTACACCATGAGCCTG      |
| T716I            | CAATAATAGCATCGCCATCCCTATCAATTTACCATCAGCGTGACCAC     |
| D796H            | ACAAGACTCCGCGGATCAAGCACTTCGGCGGCTTCAATTTCA          |
| F888L            | CACATCGGGCTGGACTTTAGGCGCCGGAGCAGCGTTG               |
| Q957R            | CGTGGTGAATCAGAATGCCCGGGCCCTGAATACCCTGGT             |
| S982A            | TACTCAACGACATCCTGGCGAGACTGGACAAGGTGGAGGCCGA         |
| T1027I           | CAATCTGGCCGCCATCAAGATGAGCGAGTGC                     |
| D1118H           | ACGAGCCTCAGATCATCACCACCcacAATACCTTCGTGAGCGGCAA      |
| V1176F           | GGGAATCAATGCCAGCTTTGTGAATATCCAGAAGGAAAT             |
| M1229I           | CATCGCCGCCTGATCGCCATCGTGATCGTGACCATCATGCTGTGCTGCA   |

### Supplementary Table 1 Primers to construct SARS-CoV-2 variants.

Forward primers for site-directed mutagenesis are listed. The reverse primers are reverse complement of the forward primers.

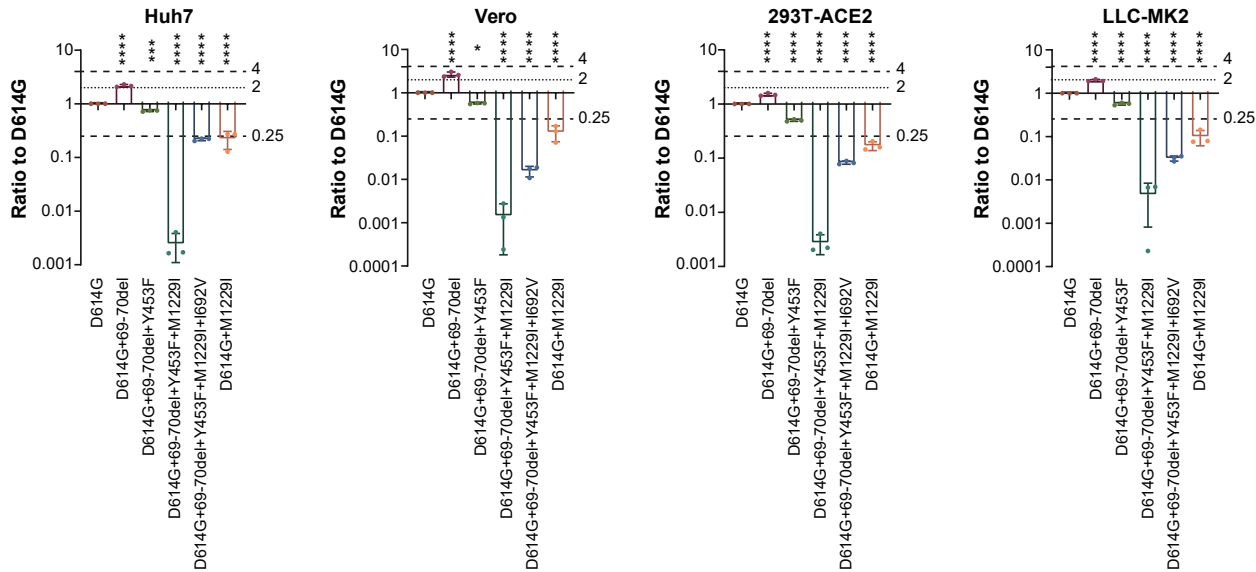

**Supplementary Figure 1 Analysis of B.1.1.298, related to Figure 2.**

SARS-CoV-2-susceptible cells as indicated were used to compare the infectivities of indicated mutations that composed B.1.1.298. The method was the same as Figure 2. Data are presented as means±SEMs from three independent experiments.

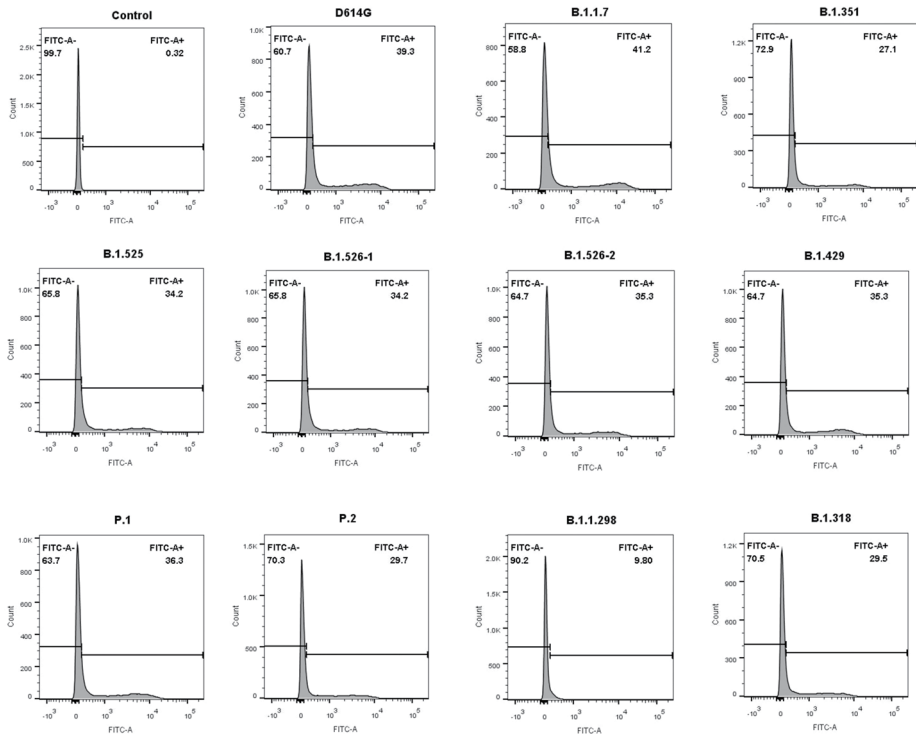

### Supplementary Figure 2 FACS analysis of membrane expression of spike protein.

Same amount of spike protein expression plasmids were transfected to 293T cells. The membrane expression level of spike protein was detected by FACS. One of three representative experiments was shown.

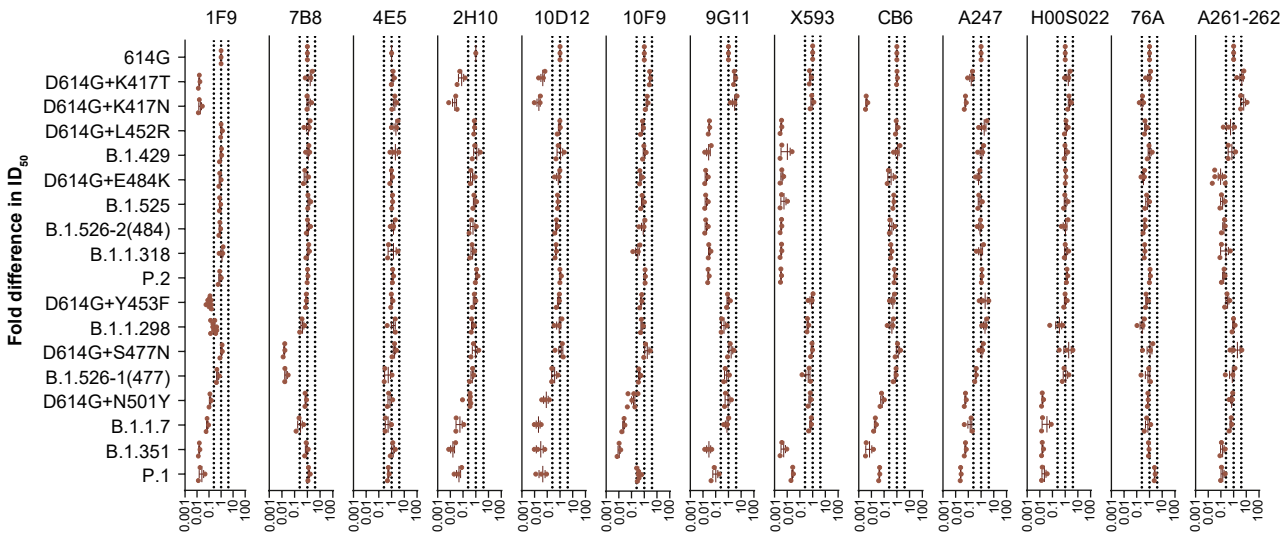

**Supplementary Figure 3 Neutralization analyses of mAbs, related to Figure 4a.**

Thirteen mAbs were examined for neutralization against ten SARS-CoV-2 variants. ID<sub>50</sub> ratios compared with D614G are presented as means±SEMs. Dashed lines indicate the threshold of fourfold difference. All experiments were repeated at least three times.

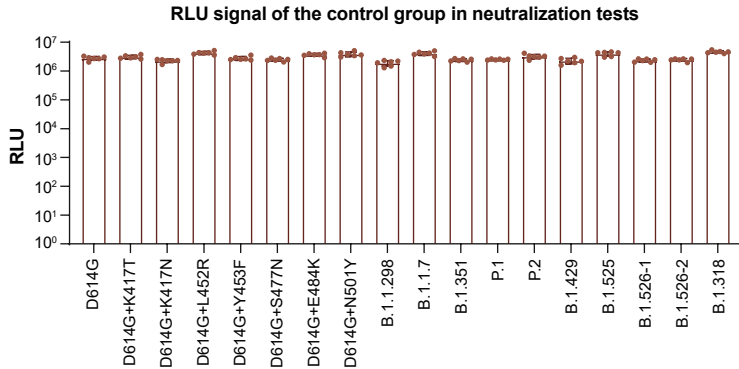

**Supplementary Figure 4 The infectivity of pseudoviruses used in the neutralization experiment.**

Pseudovirus of different variants were diluted to make sure the same level of infectivity before neutralization experiments were performed. Data are presented as means±SEMs. One representative experiment was shown. Six duplicated data was collected for each group.
